# Supplementary material for: Comparative genome sequencing and analyses of Mycobacterium cosmeticum reveal potential for biodesulfization of gasoline
Source: PLOS journal article supplement (doi:10.1371/journal.pone.0214663), 2019-04-09
Supplement: S4 (10.1371/journal.pone.0214663.s004) [file journal.pone.0214663.s004]

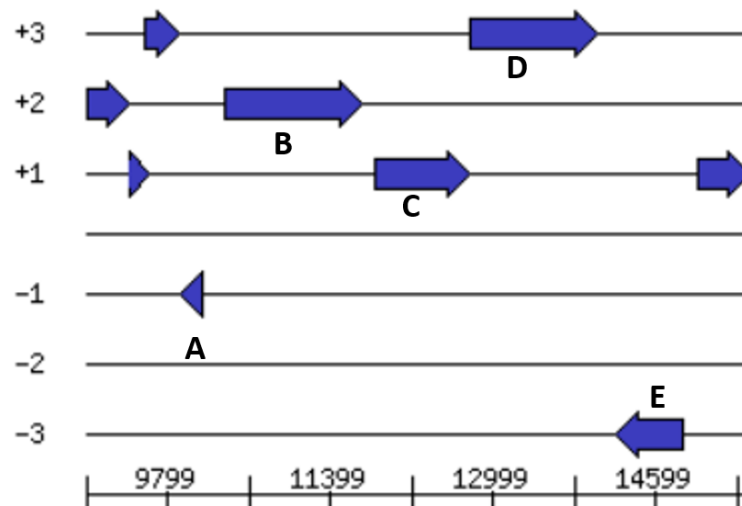

**S1 Fig. The graphical representation of GI35.** GI35 is located in the contig87 from 9,931 to 14,878. GI35 consists of 5 genes: A – Transcriptional regulator, IclR family; B - Dibenzothiophene desulfurization enzyme A; C - Dibenzothiophene desulfurization enzyme B ; D - Dibenzothiophene desulfurization enzyme C; E - Transcriptional regulator, TetR family (+3 to -3 indicated the open reading frame).
